# Supplementary material for: Novel two-dimensional magnets with an in-plane auxetic effect
Source: Royal Society of Chemistry journal article supplement (doi:10.1039/d3nr01458d), 2023-01-01
Supplement: d3nr01458d1.pdf [file d3nr01458d1.pdf]

## Supporting information

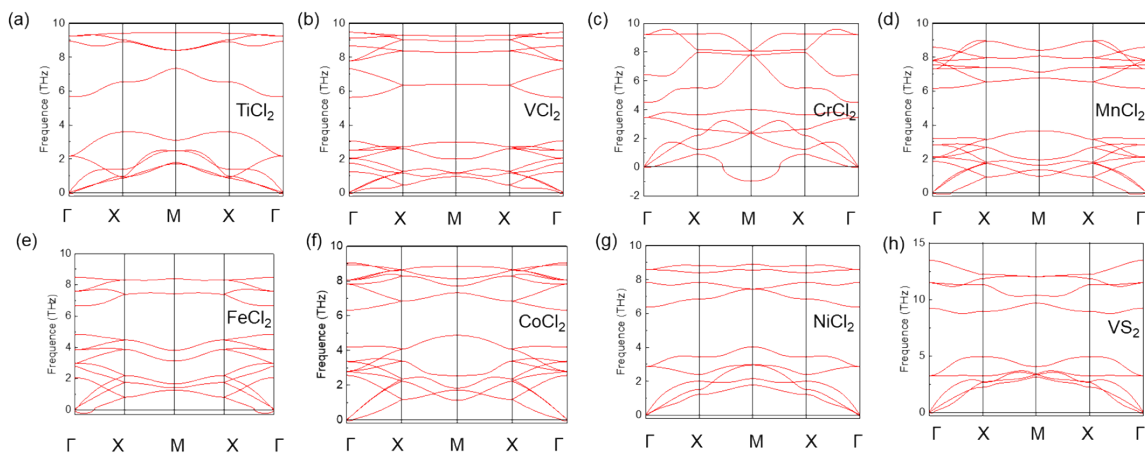

**Fig. S1** Calculated phonon dispersion of  $\text{MX}_2$  (a)  $\text{TiCl}_2$  (b)  $\text{VCl}_2$  (c)  $\text{CrCl}_2$  (d)  $\text{MnCl}_2$  (e)  $\text{FeCl}_2$  (f)  $\text{CoCl}_2$  (g)  $\text{NiCl}_2$  (h)  $\text{VS}_2$ . The results demonstrate that  $\text{MX}_2$  are dynamically stable. The small acoustic imaginary mode nearby  $\Gamma$  point, which is considered as the instability against long-wavelength transverse waves, not significantly affect the crystal structure.
